# Supplementary material for: Comparative structure activity relationship for heterogeneous phosphatase-like catalytic activities of one-dimensional Cu(ii) coordination polymers
Source: Royal Society of Chemistry journal article supplement (doi:10.1039/c6ra11102e), 2016-01-01
Supplement: c6ra11102e1.pdf [file c6ra11102e1.pdf]

## Supplementary information

### Comparative Structure Activity Relationship for Heterogeneous Phosphatase-like Catalytic Activities of One-Dimensional Cu(II) Coordination Polymers

Navid Hussain,<sup>a</sup> Pooja Joshi,<sup>b</sup> Shah Raj Ali<sup>b</sup> and Vimal K. Bhardwaj\*,<sup>a</sup>

<sup>a</sup>Department of Chemistry, Indian Institute of Technology Ropar, Rupnagar, Punjab, 140001, India.

<sup>b</sup>Department of Chemistry, D.S.B. Campus, Kumaun University, Nainital, Uttarakhand, 263002, India

#### Table of Contents

| S. No. | Figure No. | Content                                                                                     | Page No. |
|--------|------------|---------------------------------------------------------------------------------------------|----------|
| 1      | Figure S1  | Absorption spectra for the transesterification of HPNP for complex <b>2</b> and <b>3</b>    | 2        |
| 2      | Figure S2  | <sup>31</sup> P NMR of HPNP on addition of complex <b>1</b>                                 | 3        |
| 3      | Figure S3  | Time dependent <sup>31</sup> P NMR spectra for HPNP hydrolysis by complex <b>1</b>          | 3        |
| 4      | Figure S4  | Dependence of rate of reaction on substrate concentration for complex <b>3</b>              | 4        |
| 5      | Figure S5  | Powder X –ray diffraction pattern of <b>1-3</b> before and after catalytic experiments      | 4        |
| 6      | Figure S6  | Reusability of complex <b>3</b> for repeated HPNP phosphate ester bond cleavage experiments | 5        |
| 7      | Table S1   | Comparative activities from reported complexes                                              | 5        |

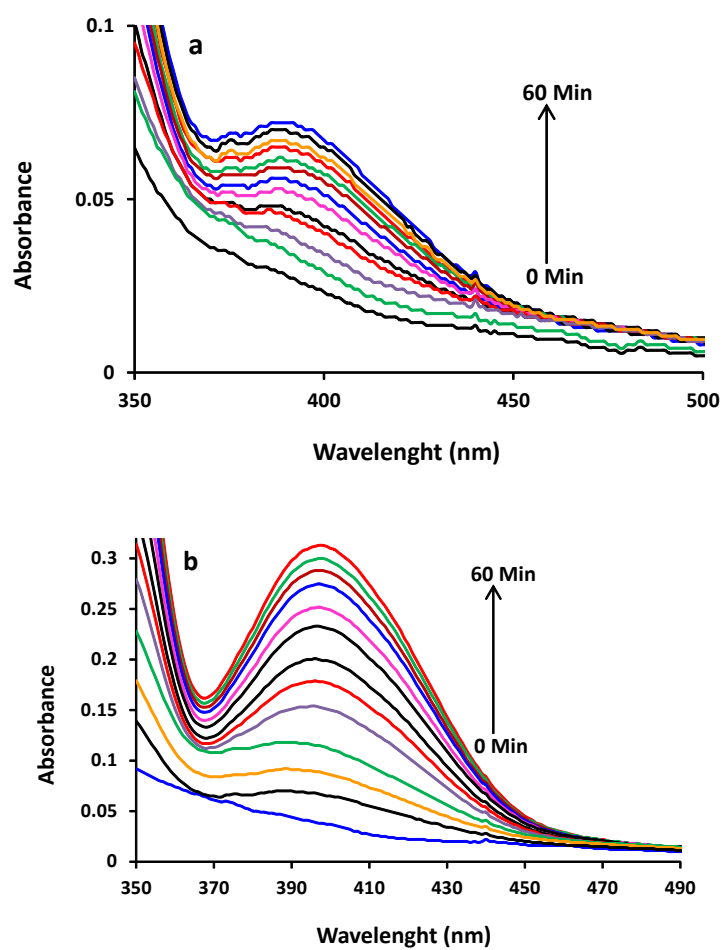

**Fig. S1** Absorption spectra for the transesterification of HPNP (100  $\mu\text{M}$ ) in the absence and presence of (a) complex 2 and (b) complex 3 (50  $\mu\text{M}$ ) in 10% MeOH recorded at an interval of 5 minutes at 30°C.

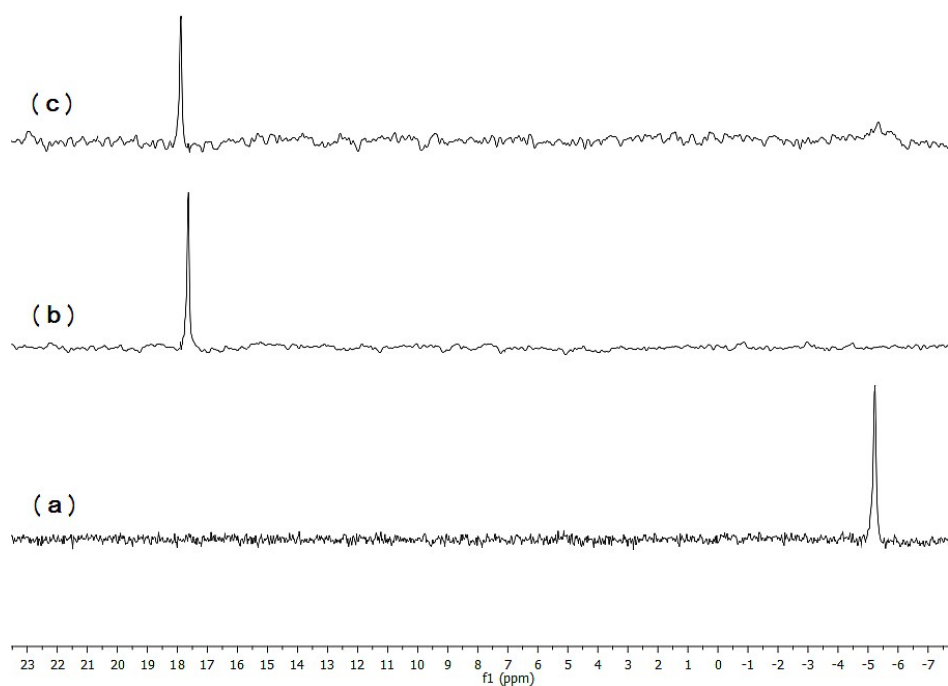

**Fig. S2**  $^{31}\text{P}$  NMR of (a) substrate (HPNP), (b) synthesised cyclic phosphate (glycero-1,2-cyclic phosphate) and (c) substrate- catalyst reaction mixture in  $\text{D}_2\text{O}/\text{DMSO-}d_6$  mixture (70:30).

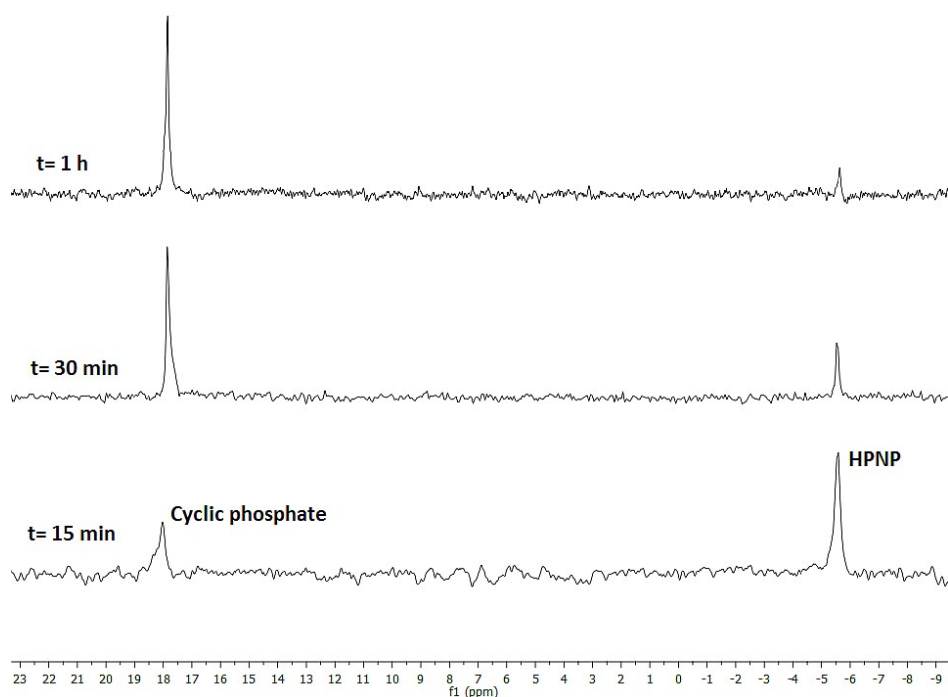

**Fig. S3.** Time dependent  $^{31}\text{P}$  NMR spectra for HPNP hydrolysis by complex 1, in  $\text{D}_2\text{O}/\text{DMSO-}d_6$  mixture (70:30),  $[\text{HPNP}] = 0.1\text{ mM}$  and  $[\text{Complex}] = 0.25\text{ mM}$ .

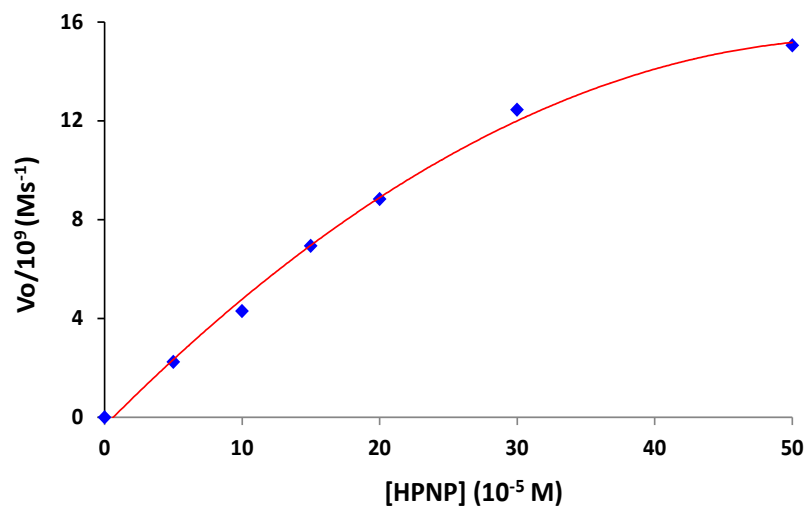

**Fig. S4** Dependence of rate of reaction on substrate concentration (50-500  $\mu$ M) for complex **3** (50  $\mu$ M) at 30  $^{\circ}$ C in 10% MeOH.

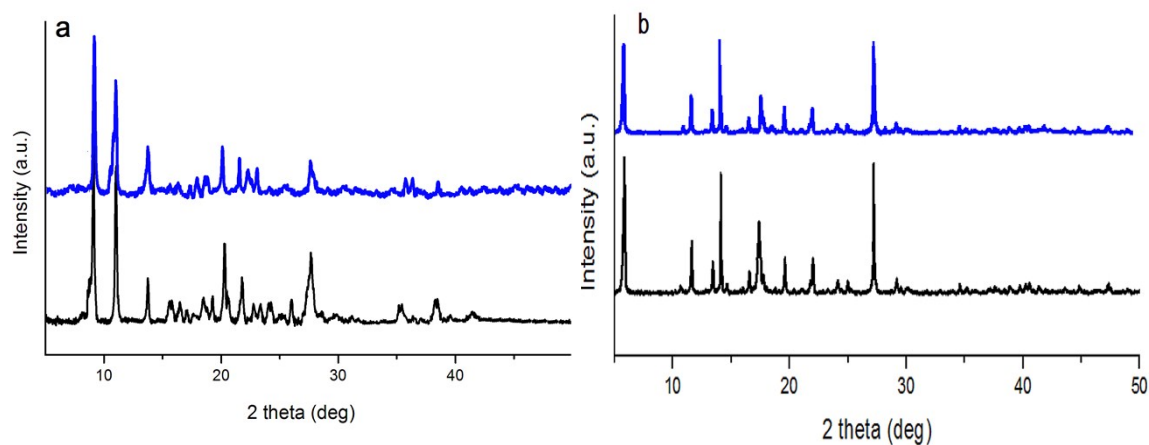

**Fig. S5** PXD patterns of (a) **1** and (b) **3** before catalytic experiments (black coloured) and after third cycle of catalytic experiments (blue coloured)

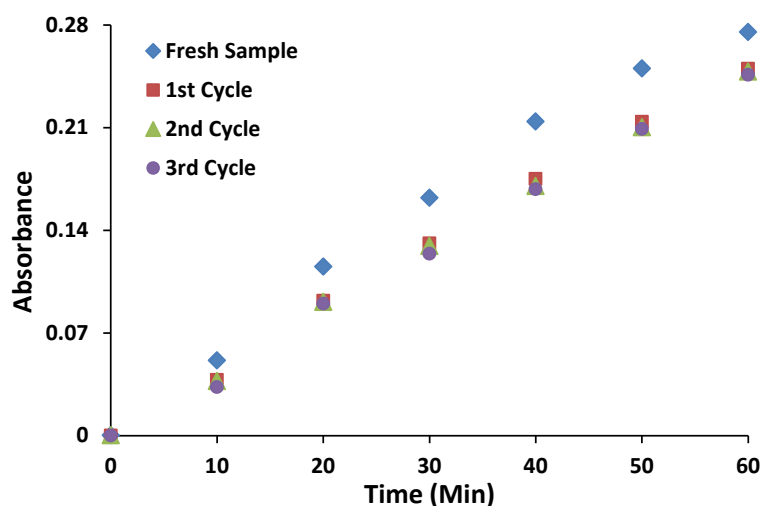

**Fig. S6** Reusability of complex **3** for repeated HPNP phosphate ester bond cleavage experiments.

**Table S1** Phosphotase like activities from reported complexes

| Complex                                                    | Substrate | Conditions                                                | $K_{cat}$ ( $s^{-1}$ ) | Reference       |
|------------------------------------------------------------|-----------|-----------------------------------------------------------|------------------------|-----------------|
| $[Ni_2L(H_2O)_4]4H_2O \cdot 2ClO_4$                        | 4-NPP     | acetonitrile–water<br>(2.5% (v/v), 25° C                  | $3.5 \times 10^{-4}$   | S1              |
| $[Zn(bpy)Cl_2]$                                            | BNPP      | water, 25 °C                                              | $5.7 \times 10^{-7}$   | S2              |
| $[Zn_2(L_2)-(\mu-O_2CMe)_2(MeCN)_2][PF_6]$                 | HPNP      | MeOH-H <sub>2</sub> O (33%,<br>v/v), 30° C                | $3.44 \times 10^{-4}$  | S3              |
| $[Zn_2(L)(H_2O)_2]$                                        | 3',5-UpU  | water, 25 °C                                              | $2.8 \times 10^{-5}$   | S4              |
| $[Cu_2(H_2pat^1)-(\mu-OH)(H_2O)_2]$                        | BDNPP     | H <sub>2</sub> O : MeCN :<br>MeOH = 50 : 45 : 5,<br>25 °C | $3.95 \times 10^{-3}$  | S5              |
| $Zn_2(bpmp)(\mu-OH)(ClO_4)_2$                              | HPNP      | DMSO-H <sub>2</sub> O (30%,<br>v/v), 25° C                | $6.4 \times 10^{-4}$   | S6              |
| $\{[Cu_3(L^1)(NO_3)_2(DMF)(H_2O)] \cdot 3(DMF)\}_n$<br>(1) | HPNP      | MeOH-H <sub>2</sub> O (10%,<br>v/v), 30° C                | $9.6 \times 10^{-3}$   | Present<br>work |

## References

- [S1] S. Anbu, M. Kandaswamy and B. Varghese, *Dalton Trans.*, 2010, **39**, 3823–3832
- [S2] J. He, J. Sun, Z.-W. Mao, L.-N. Ji and H. J. Sun, *Inorg. Biochem.* 2009, **103**, 851–858.
- [S3] H. Arora, S. K. Barman, F. Lloret and R. Mukherjee, *Inorg. Chem.* 2012, **51**, 5539–5553
- [S4] H. Linjalahti, G. Feng, J. C. Mareque-Rivas, S. Mikkola and N. H. Williams, *J. Am. Chem. Soc.* 2008, **130**, 4232.
- [S5] P. Comba, L. R. Gahan, G. R. Hanson and M. Westphal, *Chem. Commun.* 2012, **48**, 9364–9366
- [S6] K. Selmeczi, C. Michel, A. Milet, I. Gautier-Luneau, C. Philouze, J. –L. Pierre, D. Schnieders, A. Rompel and C. Belle, *Chem. Eur. J.* 2007, **13**, 9093 – 9106
